# Supplementary material for: Hepatocellular carcinoma associated microRNA expression signature: integrated bioinformatics analysis, experimental validation and clinical significance
Source: Oncotarget. 2015 Jun 30;6(28):25093–108. doi: 10.18632/oncotarget.4437 (PMC4694817; doi:10.18632/oncotarget.4437)
Supplement: Supplementary file 1 [file oncotarget-06-25093-s001.pdf]

## SUPPLEMENTARY FIGURES AND TABLES

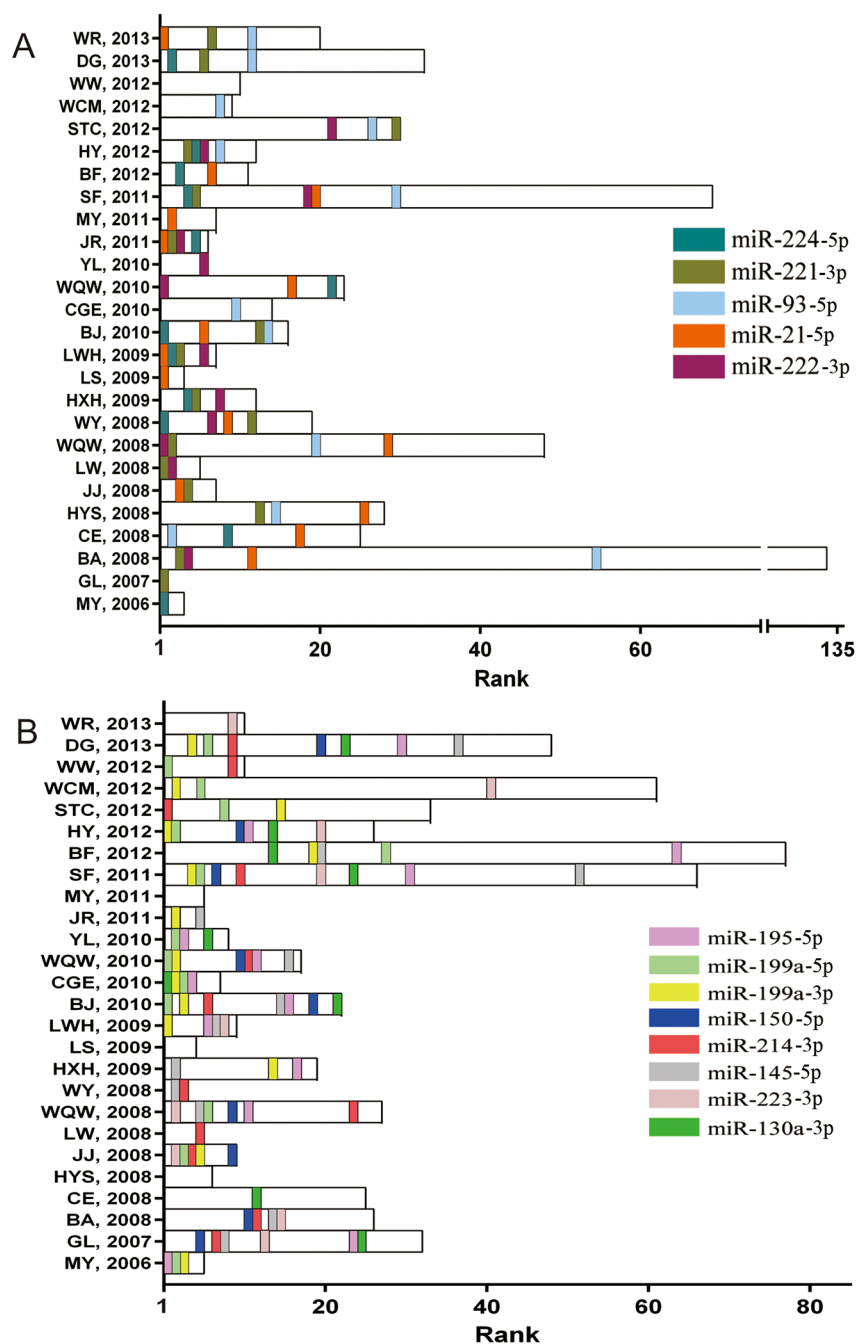

**Supplementary Figure 1: Positions of HCC integrated-signature miRNAs identified by robust rank aggregation analysis.** The number of significantly upregulated **A.** or downregulated **B.** miRNAs was designated in the boxes. The rank scale was shown on the left. HCC, hepatocellular carcinoma; miRNA, microRNA.

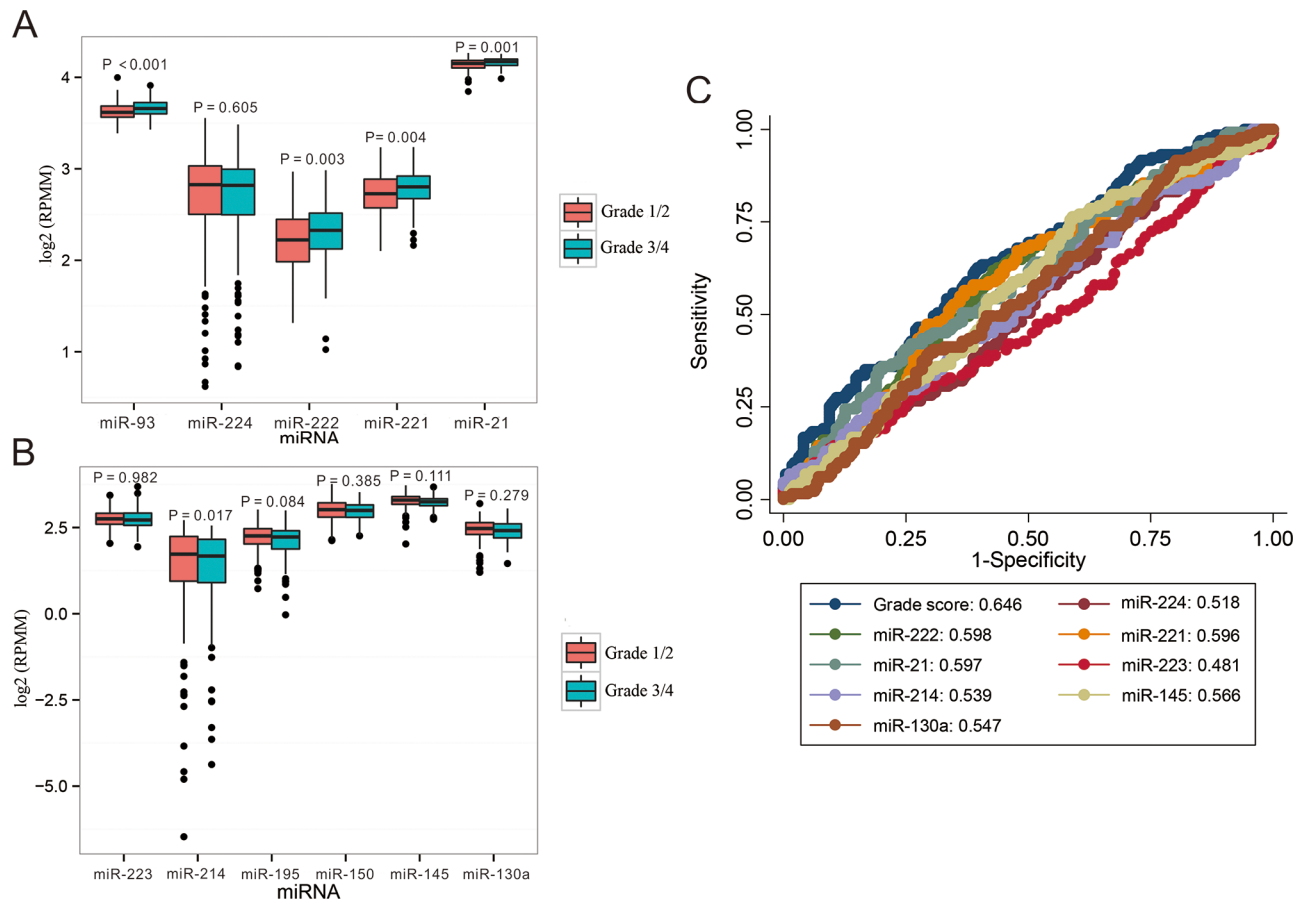

**Supplementary Figure 2: miRNAs expression in different tumor grades on the TCGA dataset.** **A.** Upregulated miRNAs expression. **B.** Downregulated miRNAs expression. **C.** Performances of the 5 miRNAs in tumor grade classification. For boxplots, expression values of miRNAs were  $\log_2$ -transformed and box width was proportional to the square root of sample size in each variant. Grade score was built using LASSO regression model by R software:  $0.0427E\_miR-222 + 0.0030E\_miR-221 + 0.0763E\_miR-21 - 0.0184E\_miR-214 - 3p + 0.0098E\_miR-130a$ .  $E\_miR-n = \log_2(\text{expression of microRNA } n)$ . Grade 1/2: well-differentiated tumor grade, Grade 3/4: moderately/poorly differentiated tumor grade. miRNA, microRNA; TCGA, Tumor Cancer Genome Atlas.

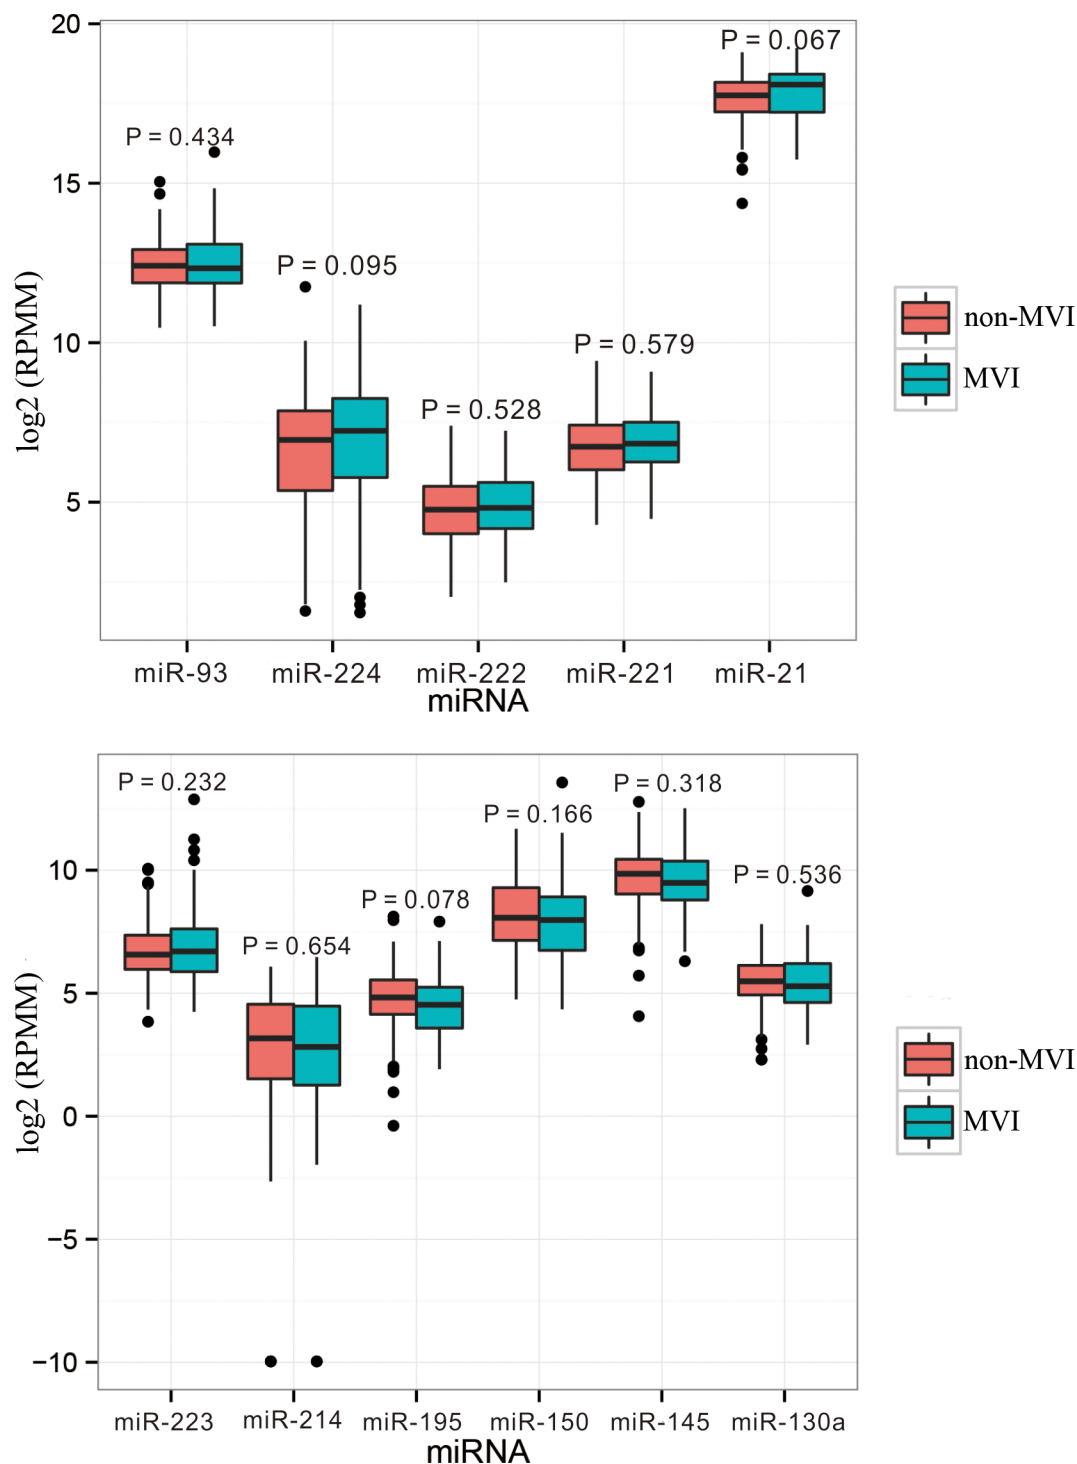

**Supplementary Figure 3: miRNAs expression in presence and absence of microscopic vascular invasion on the TCGA dataset.** A. upregulated miRNAs expression on the TCGA dataset. B. downregulated miRNAs expression on the TCGA dataset. For boxplots, expression values of miRNAs were log2-transformed and box width was proportional to the square root of sample size in each variant. MVI, microscopic vascular invasion. miRNA, microRNA; TCGA, Tumor Cancer Genome Atlas.

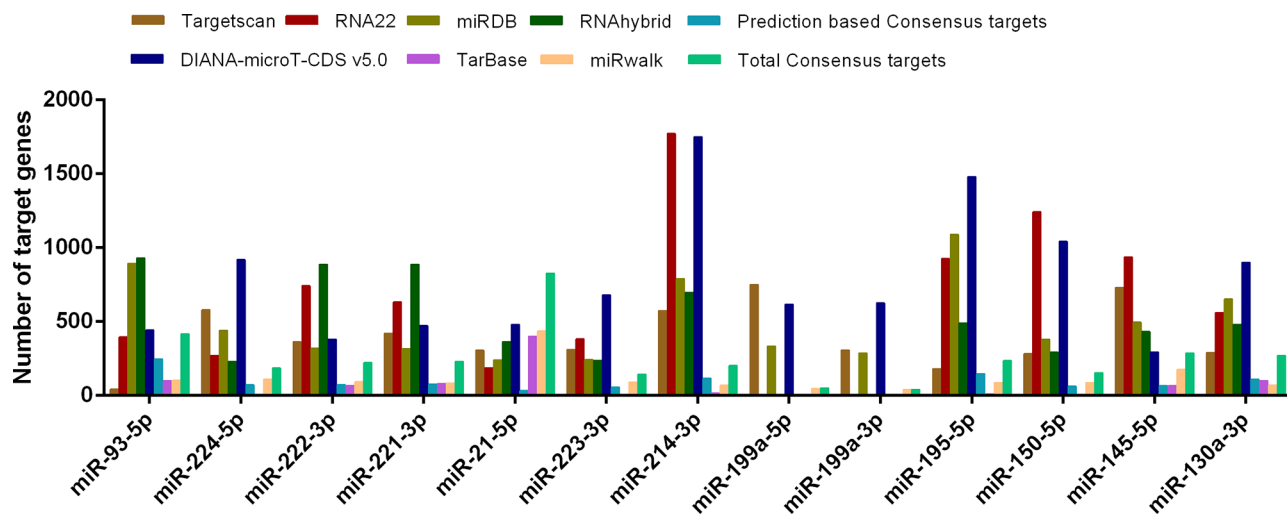

**Supplementary Figure 4: The distribution of target counts predicted by target prediction algorithms.** Prediction based consensus targets were defined as genes predicted by at least 4 algorithms. Consensus targets were defined as genes predicted by at least 4 algorithms plus validated targets from TarBase and starBase.

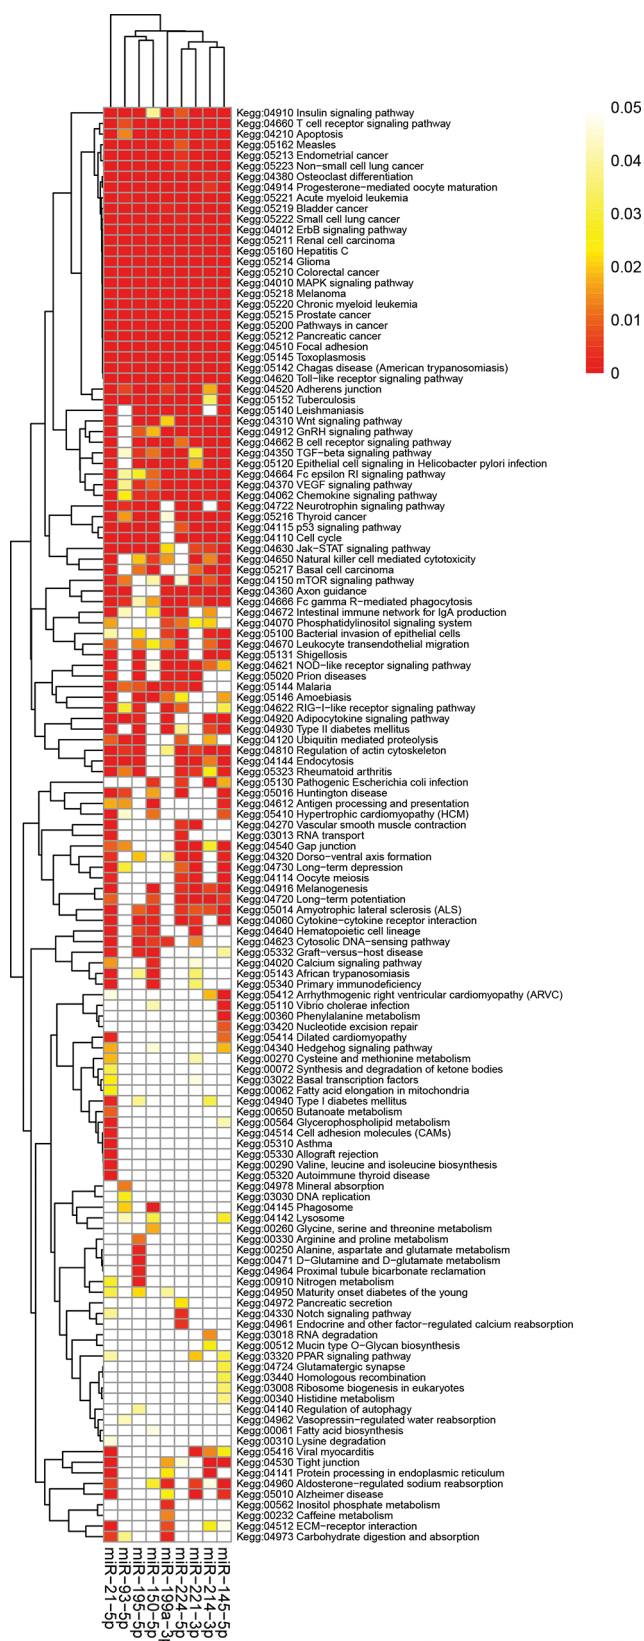

**Supplementary Table 1: Characteristics of included datasets**

| First author, year | Ref. | Region        | Assay type                 | Number of miRNA probes | Number of samples | Etiology |
|--------------------|------|---------------|----------------------------|------------------------|-------------------|----------|
| MY, 2006           | 3    | Asia          | Custom microarray          | 386                    | 25 pairs          | mixed    |
| GL, 2007           | 13   | Europe        | Custom microarray          | 381                    | 13 pairs          | mixed    |
| BA, 2008           | 6    | North America | Custom microarray          | 482                    | 241 pairs         | mixed    |
| CE, 2008           | 14   | North America | miRCURY LNA microRNA Array | 278                    | 19 pairs          | HBV      |
| HYS, 2008          | 5    | Asia          | Custom microarray          | 331                    | 10 pairs          | mixed    |
| JJ, 2008           | 22   | North America | System Biosciences, Taqman | 182                    | 54 pairs          | mixed    |
| LW, 2008           | 4    | Asia          | Custom microarray          | 509                    | 78 pairs          | mixed    |
| WQW, 2008          | 9    | Asia          | mirMAX array               | 182                    | 42 pairs          | mixed    |
| WY, 2008           | 23   | Asia          | System Biosciences, Taqman | 157                    | 19 pairs          | mixed    |
| HXH, 2009          | 24   | Asia          | mirMASA technique          | 114                    | 20 pairs          | mixed    |
| LS, 2009           | 7    | Asia          | QuantiTect PCR             | 453                    | 20 pairs          | mixed    |
| LWH, 2009          | 25   | Asia          | System Biosciences, Taqman | 233                    | 80 pairs          | mixed    |
| BJ, 2010           | 20   | North America | Affymetrix GeneChip array  | 220                    | 96 pairs          | HBV      |
| CGE, 2010          | 26   | Asia          | Custom microarray          | 449                    | 25 pairs          | mixed    |
| WQW, 2010          | 15   | Asia          | System Biosciences, Taqman | 156                    | 12 pairs          | HBV      |
| YL, 2010           | 10   | Asia          | Exiqon miRCURY LNA array   | 730                    | 8 pairs           | HBV      |
| JR, 2011           | 16   | Asia          | SOLiD sequencing           | 182                    | 116 pairs         | HBV      |
| MY, 2011           | 19   | Asia          | GS 454 technology          | 208818                 | 22 pairs          | mixed    |
| SF, 2011           | 29   | Asia          | Exiqon miRCURY LNA array   | 857                    | 73 pairs          | mixed    |
| BF, 2012           | 27   | Europe        | System Biosciences, Taqman | 378                    | 19 pairs          | mixed    |
| HY, 2012           | 28   | Asia          | Affymetrix GeneChip array  | 270                    | 20 pairs          | mixed    |
| STC, 2012          | 8    | Asia          | Illumina microarray V2     | 1145                   | 81 pairs          | mixed    |
| WCM, 2012          | 12   | Asia          | qPCR, Mega Plex kit        | 664                    | 20 pairs          | mixed    |
| WW, 2012           | 17   | Asia          | qPCR, Mega Plex kit        | 667                    | 18 pairs          | HBV      |
| DG, 2013           | 21   | Europe        | Affymetrix GeneChip array  | 2226                   | 9 pairs           | HCV      |
| WR, 2013           | 18   | Asia          | Custom microarray          | 683                    | 110 pairs         | HBV      |

HBV, hepatitis B virus; HCV, hepatitis C virus; miRNA, microRNA

**Supplementary Table 2: The most significant 10 pathways and GO processes enriched by targets of rank aggregation microRNAs**

| Panther pathways                                                                  | FDR       | Targets |
|-----------------------------------------------------------------------------------|-----------|---------|
| P00006: Apoptosis signaling pathway                                               | 9.745E-22 | 33      |
| P00036: Interleukin signaling pathway                                             | 2.29E-21  | 31      |
| P00005: Angiogenesis                                                              | 7.88E-19  | 35      |
| P00047: PDGF signaling pathway                                                    | 1.22E-14  | 28      |
| P00048: PI3 kinase pathway                                                        | 2.03E-13  | 15      |
| P04398: p53 pathway feedback loops 2                                              | 5.08E-13  | 17      |
| P00059: p53 pathway                                                               | 5.15E-13  | 21      |
| P00052: TGF-beta signaling pathway                                                | 1.03E-12  | 22      |
| P04393: Ras Pathway                                                               | 3.45E-12  | 19      |
| P00018: EGF receptor signaling pathway                                            | 1.32E-11  | 23      |
| KEGG pathways                                                                     |           |         |
| 05200: Pathways in cancer                                                         | 6.70E-56  | 90      |
| 05220: Chronic myeloid leukemia                                                   | 6.065E-31 | 35      |
| 05212: Pancreatic cancer                                                          | 1.83E-30  | 34      |
| 05210: Colorectal cancer                                                          | 2.30E-28  | 31      |
| 05215: Prostate cancer                                                            | 3.07E-25  | 33      |
| 05162: Measles                                                                    | 1.12E-22  | 29      |
| 05142: Chagas disease                                                             | 8.14E-22  | 32      |
| 04510: Focal adhesion                                                             | 3.87E-20  | 27      |
| 05222: Small cell lung cancer                                                     | 5.91E-20  | 28      |
| 04010: MAPK signaling pathway                                                     | 5.35E-19  | 45      |
| GO processes                                                                      |           |         |
| GO: 0045944: positive regulation of transcription from RNA polymerase II promoter | 2.74E-71  | 133     |
| GO: 0045893: positive regulation of transcription                                 | 3.54E-43  | 93      |
| GO: 0043066: negative regulation of apoptotic process                             | 9.15E-35  | 65      |
| GO: 0000122: negative regulation of transcription from RNA polymerase II promoter | 6.33E-30  | 73      |
| GO: 0045892: negative regulation of transcription                                 | 2.10E-29  | 71      |
| GO: 0008284: positive regulation of cell proliferation                            | 2.75E-27  | 65      |
| GO: 0006355: regulation of transcription                                          | 2.81E-27  | 145     |
| GO: 0042493: response to drug                                                     | 4.99E-25  | 57      |
| GO: 0008285: negative regulation of cell proliferation                            | 7.55E-24  | 59      |
| GO: 0043065: positive regulation of apoptotic process                             | 3.82E-20  | 40      |

FDR, false discovery rate

**Supplementary Table 3: The primers of each miRNAs from QIAGEN**

| miRNAs          | Product code |
|-----------------|--------------|
| hsa-miR-93-5p   | MS00003346   |
| hsa-miR-224-5p  | MS00003878   |
| hsa-miR-222-3p  | MS00007609   |
| hsa-miR-221-3p  | MS00003857   |
| hsa-miR-21-5p   | MS00009079   |
| hsa-miR-223-3p  | MS00003871   |
| hsa-miR-214-3p  | MS00031605   |
| hsa-miR-199a-5p | MS00006741   |
| hsa-miR-199a-3p | MS00007602   |
| hsa-miR-195-5p  | MS00003703   |
| hsa-miR-150-5p  | MS00003577   |
| hsa-miR-145-5p  | MS00003528   |
| hsa-miR-130a-3p | MS00003444   |

**Supplementary Table 4: Clinical characteristics of the patients in the Tumor Cancer Genome Atlas datasets (*n* = 373)\***

| Characteristics                    | Value       |
|------------------------------------|-------------|
| Male (%)                           | 240 (64.3%) |
| Age (year)                         | 59.7 ± 13.1 |
| Etiology ( <i>n</i> = 354)         |             |
| Alcohol                            | 75 (21.2%)  |
| Hepatitis B                        | 75 (21.2%)  |
| Hepatitis C                        | 32 (9.0%)   |
| Alcohol/Viral hepatitis            | 39 (11.0%)  |
| Other                              | 28 (7.9%)   |
| Unknown                            | 105 (29.7%) |
| Tumor grade ( <i>n</i> = 349)      |             |
| G1/2                               | 218 (62.5%) |
| G3/4                               | 131 (37.5%) |
| Pathologic stage ( <i>n</i> = 333) |             |
| Stage I/II                         | 247 (74.2%) |
| Stage III/IV                       | 86 (25.8%)  |
| MVI                                | 91/286      |
| Mortality                          | 87 (23.3%)  |

\*Clinical information was not available in 19 patients.

MVI, microscopic vascular invasion
